# Supplementary material for: All-inorganic tin-doped Cs2BiAgCl6 double perovskites with stable blue photoluminescence for WLEDs
Source: Royal Society of Chemistry journal article supplement (doi:10.1039/d1tc02168k), 2021-01-01
Supplement: d1tc02168k1.pdf [file d1tc02168k1.pdf]

## **All-inorganic tin-doped Cs<sub>2</sub>BiAgCl<sub>6</sub> double perovskite with stability blue photoluminescence WLEDs**

Dayu Huang,<sup>a,b,c</sup> Hui Xiao,<sup>a</sup> Dongjie Liu,<sup>a</sup> Qiuyun Ouyang,<sup>b</sup> Youchao Kong,<sup>d</sup> Bo Wang,<sup>c,\*</sup> Hongzhou Lian<sup>a,\*</sup> and Jun Lin<sup>a,c,\*</sup>

<sup>a</sup> State Key Laboratory of Rare Earth Resource Utilization, Changchun Institute of Applied Chemistry, Chinese Academy of Sciences, Changchun 130022, P. R. China.

<sup>b</sup> Key Laboratory of In-Fiber Integrated Optics, Ministry Education of China, and College of Physics and Optoelectronic Engineering, Harbin Engineering University, Harbin 150001, China.

<sup>c</sup> School of Applied Physics and Materials, Wuyi University, Jiangmen, Guangdong, 529020, P. R. China.

<sup>d</sup> Institute of Applied Physics and Materials Engineering, University of Macau, Macao SAR, 999078, P. R. China.

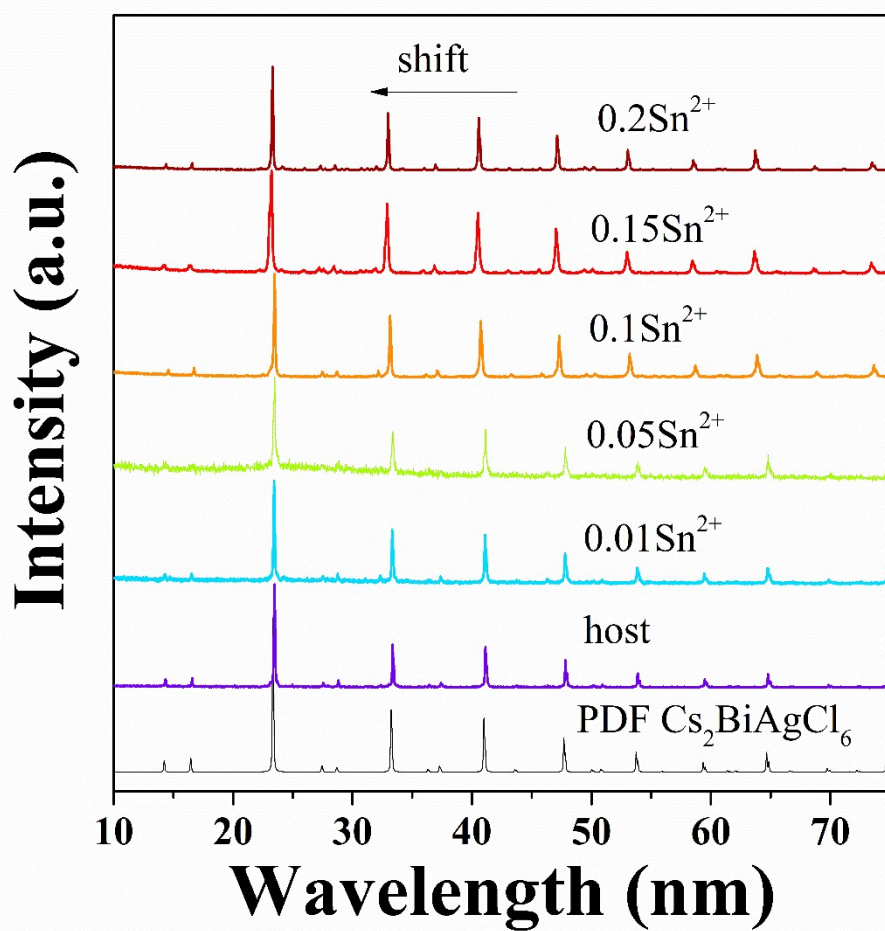

Figure S1. PXRD patterns of the Sn-doped and pristine Cs<sub>2</sub>BiAgCl<sub>6</sub>.

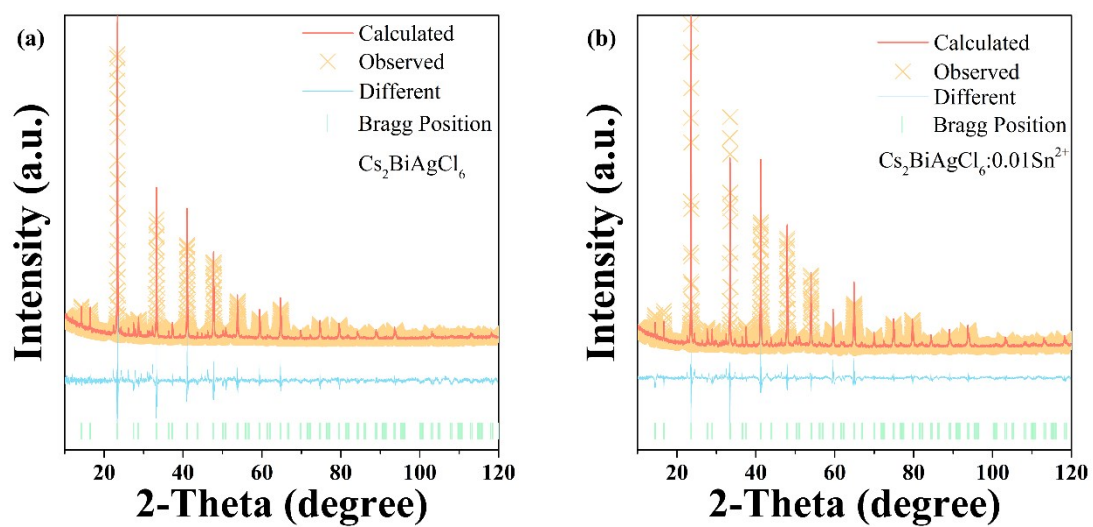

Figure S2. The Rietveld refinement of the host and representative  $\text{Cs}_2\text{BiAgCl}_6:0.01\text{Sn}^{2+}$ .

Table S1. Main parameters of processing and refinement of the  $\text{Cs}_2\text{BiAgCl}_6\cdot x\text{Sn}^{2+}$  samples.

| $x$      | $a=b=c$ ( $\text{Å}$ ) | $V$ ( $\text{Å}^3$ ) | $R_{wp}$ (%) | $R_p$ (%) |
|----------|------------------------|----------------------|--------------|-----------|
| standard | 10.777                 | 1251.68              |              |           |
| 0        | 10.771                 | 1249.592             | 4.63         | 3.76      |
| 0.1      | 10.784                 | 1254.240             | 5.76         | 4.53      |

Table S2. Selected interatomic distances in samples.

| Bond      | Length (Å) | Optr. Cell | Neighbor atom coordinates |
|-----------|------------|------------|---------------------------|
| $x = 0$   |            |            |                           |
| Cl-Cs     | 3.81403(4) | 9 0 0 0    | 0.25000 -0.25000 -0.25000 |
| Cl-Bi     | 2.57586(4) | 1 0 0 0    | 0.00000 0.00000 0.00000   |
| Cl-Ag     | 2.81533(4) | 101 0-1-1  | 0.50000 0.00000 0.00000   |
| $x = 0.1$ |            |            |                           |
| Cl-Cs     | 3.81304(7) | 9 0 0 0    | 0.25000 -0.25000 -0.25000 |
| Cl-Bi     | 2.65677(7) | 1 0 0 0    | 0.00000 0.00000 0.00000   |
| Cl-Ag     | 2.73541(8) | 101 0-1-1  | 0.50000 0.00000 0.00000   |

Table S3. Fractional atomic coordinates and isotropic displacement parameters in samples.

| $x = 0$          | frac. | $x$  | $y$  | $z$  | $100*U_{\text{iso}}$ |
|------------------|-------|------|------|------|----------------------|
| Cs <sup>+</sup>  | 1.015 | 0.25 | 0.25 | 0.25 | 3.983                |
| Bi <sup>3+</sup> | 0.983 | 0.00 | 0.00 | 0.00 | 2.107                |
| Ag <sup>+</sup>  | 1.016 | 0.50 | 0.50 | 0.50 | 2.413                |
| Cl <sup>-</sup>  | 1.000 | 0.24 | 0.00 | 0.00 | 3.709                |
| $x = 0.1$        | frac. | $x$  | $y$  | $z$  | $100*U_{\text{iso}}$ |
| Cs <sup>+</sup>  | 1.025 | 0.25 | 0.25 | 0.25 | 4.025                |
| Bi <sup>3+</sup> | 1.051 | 0.00 | 0.00 | 0.00 | 2.257                |
| Ag <sup>+</sup>  | 1.152 | 0.50 | 0.50 | 0.50 | 2.543                |
| Cl <sup>-</sup>  | 1.176 | 0.24 | 0.00 | 0.00 | 3.820                |

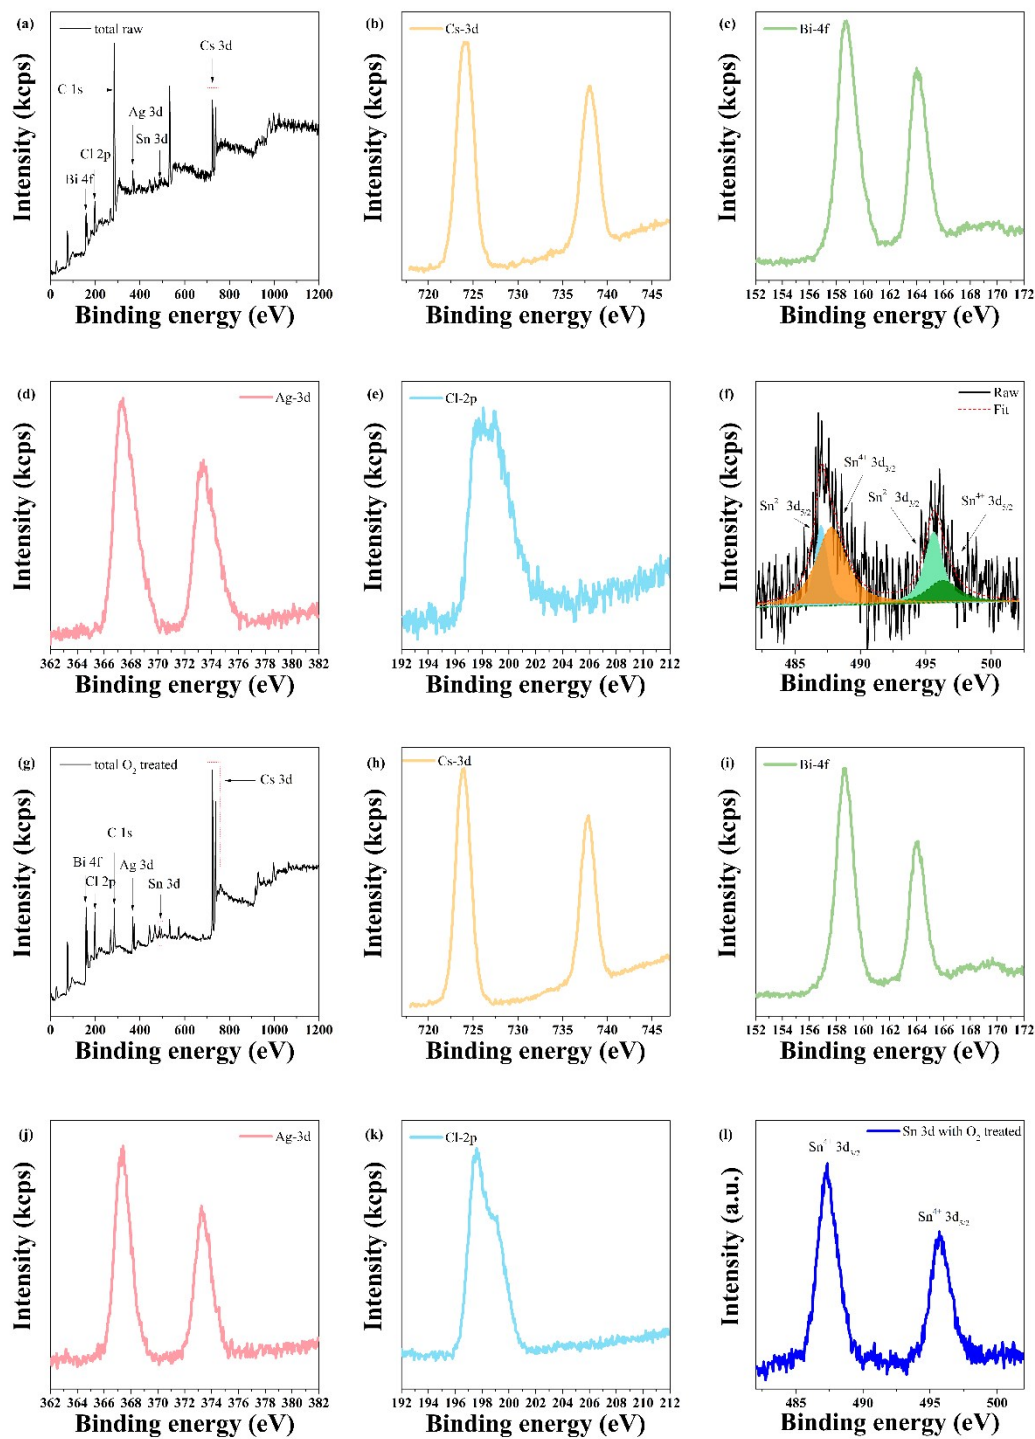

Figure S3. XPS spectra corresponding to (a) raw total, (b) raw Cs 3d, (c) raw Bi 4f, (d) raw Ag 3d, (e) raw Cl 2p, (f) raw Sn 3d, (g) O<sub>2</sub> treated total, (h) O<sub>2</sub> treated Cs 3d, (i) O<sub>2</sub> treated Bi 4f, (j) O<sub>2</sub> treated Ag 3d, (k) O<sub>2</sub> treated Cl 2p, (l) O<sub>2</sub> treated Sn 3d.

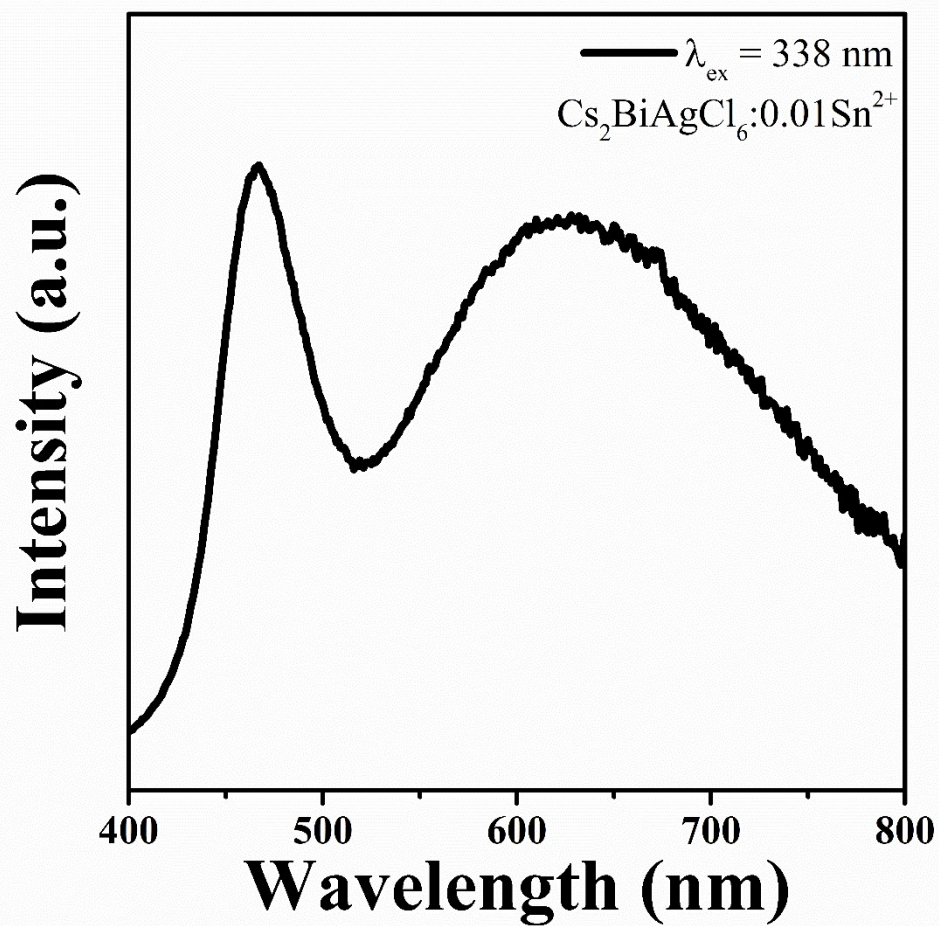

Figure S4. PL for  $\text{Cs}_2\text{BiAgCl}_6:0.01\text{Sn}^{2+}$ .



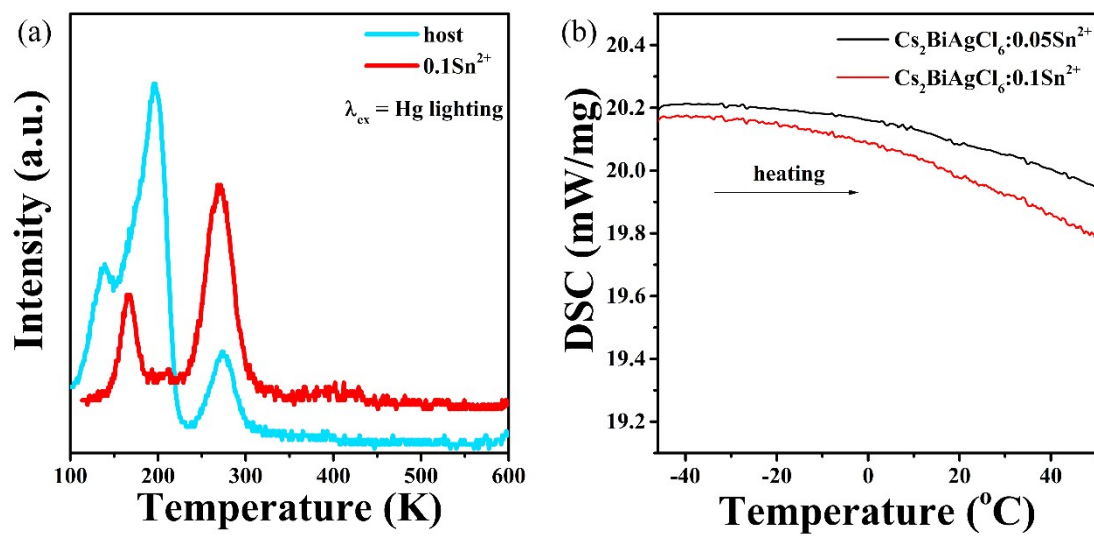

Figure S5. (a) TL for  $\text{Cs}_2\text{BiAgCl}_6:0.1\text{Sn}^{2+}$ , (b) Differential scanning calorimetry (DSC) curves of pristine  $\text{Cs}_2\text{BiAgCl}_6:x\text{Sn}^{2+}$  in heating progress.

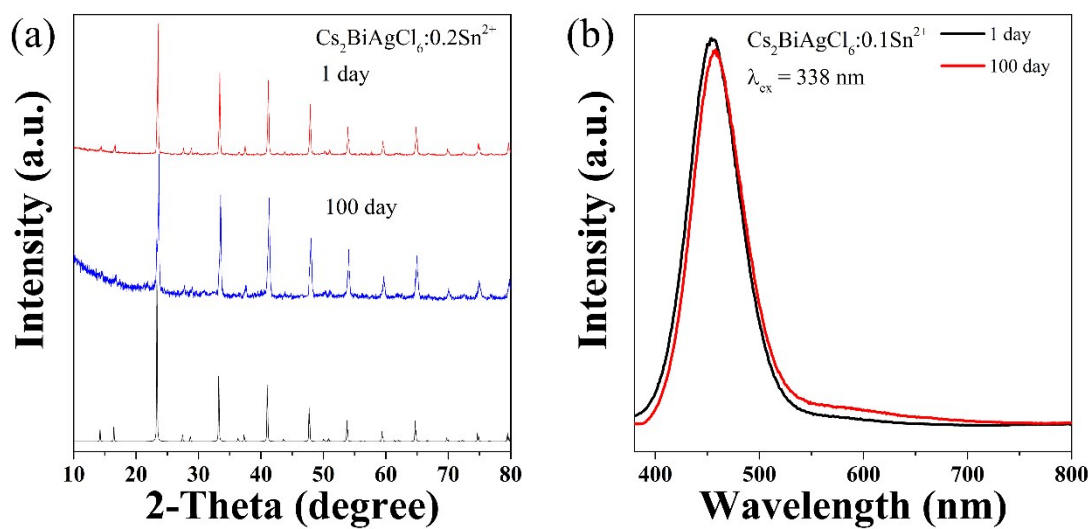

Figure S6. (a) XRD of pristine and  $\text{Cs}_2\text{BiAgCl}_6:0.2\text{Sn}^{2+}$  after being exposed to air for 100 days, (b) PL intensity of pristine and  $\text{Cs}_2\text{BiAgCl}_6:0.1\text{Sn}^{2+}$  after being exposed to air for 100 days.
